# Supplementary material for: Investigating the Association between Outdoor Environment and Outdoor Activities for Seniors Living in Old Residential Communities
Source: MDPI journal article supplement (doi:10.3390/ijerph18147500), 2021-07-14
Supplement: s1 [file s1]

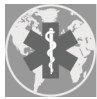

# Investigating the Association between Outdoor Environment and Outdoor Activities for Seniors Living in Old Residential Communities

Shiwan Yu <sup>1</sup>, Na Guo <sup>2</sup>, Caimiao Zheng <sup>1</sup>, Yu Song <sup>3</sup> and Jianli Hao <sup>4,\*</sup>

<sup>1</sup> School of Civil Engineering, Sanjiang University, Nanjing 210012, China; Sherwood.s.w.yu@gmail.com (S.Y.); 12017082031@stu.sju.edu.cn (C.Z.)

<sup>2</sup> College of Economic and Management, Nanjing Institute of Industry Technology, Nanjing 210023, China; Guon@niit.edu.cn

<sup>3</sup> XIPU Institution, Xi'an Jiaotong-Liverpool University, Suzhou 215123, China; yu.song@xjtlu.edu.cn

<sup>4</sup> Department of Civil Engineering, Xi'an Jiaotong-Liverpool University, Suzhou 215123, China

\* Correspondence: jianli.hao@xjtlu.edu.cn

## Levene test of ODAs

Levene's test was conducted to check the differences in variables for the respondents in fourteen surveyed ORCs. The *p*-value was set as 0.0007 to control Type I error. The results were summarised in Table S1 and S2. All the *P* values of ODAs were larger than 0.001, which means this research did not violate the homogeneity of variances assumption (refer to Table S1). The variable data of fourteen ORCs were finally combined in this study.

**Table S1.** The details of means, ANOVA and Levene test for four types of outdoor daily activities.

| Factors                           | Mean   | S.D.    | ANOVA |       | Homogeneity tests |       |
|-----------------------------------|--------|---------|-------|-------|-------------------|-------|
|                                   |        |         | F.    | Sig.  | Levene statistic  | Sig.  |
| ODAS1-Social activities           | 3.5104 | 0.79057 | 0.833 | 0.640 | 1.604             | 0.073 |
| ODAS2-Leisure activities          | 2.7119 | 0.95812 | 2.294 | 0.005 | 1.133             | 0.328 |
| ODAS3- Outdoor UTA                | 2.6808 | 0.90783 | 1.006 | 0.450 | 2.256             | 0.006 |
| ODAS4- Nature exposure activities | 3.6237 | 1.01379 | 0.679 | 0.805 | 2.360             | 0.004 |

Note: The questionnaire comprised 69 questions, and the adjusted *p*-value was 0.0007 (0.05/69) to control Type I error.

**Table S2.** Comparison of means of four types of ODAs among fourteen surveyed ORCs.

| Factors                  | ORCs  | N   | Mean   | Standard Deviation | Standard Error |
|--------------------------|-------|-----|--------|--------------------|----------------|
| ODAS1-Social activities  | 1.00  | 16  | 3.7083 | 0.7876             | 0.1969         |
|                          | 2.00  | 14  | 3.7381 | 1.1996             | 0.3206         |
|                          | 3.00  | 17  | 3.1569 | 0.7371             | 0.1788         |
|                          | 4.00  | 18  | 3.6111 | 1.1217             | 0.2644         |
|                          | 5.00  | 16  | 3.7708 | 1.0163             | 0.2541         |
|                          | 6.00  | 16  | 3.6042 | 1.1037             | 0.2759         |
|                          | 7.00  | 15  | 3.2667 | 1.1423             | 0.2949         |
|                          | 8.00  | 18  | 3.4074 | 1.2862             | 0.3032         |
|                          | 9.00  | 16  | 3.8125 | 0.6321             | 0.1580         |
|                          | 10.00 | 16  | 3.6875 | 0.9307             | 0.2327         |
|                          | 11.00 | 14  | 3.7619 | 0.9734             | 0.2602         |
|                          | 12.00 | 17  | 3.8824 | 1.0337             | 0.2507         |
|                          | 13.00 | 16  | 3.7083 | 1.1345             | 0.2836         |
|                          | 14.00 | 16  | 3.3542 | 0.9386             | 0.2347         |
|                          | 15.00 | 14  | 3.5238 | 1.2175             | 0.3254         |
|                          | 16.00 | 17  | 4.0000 | 0.8165             | 0.1980         |
|                          | Total | 256 | 3.6237 | 1.0138             | 0.0634         |
| ODAS2-Leisure activities | 1.00  | 14  | 3.6429 | 0.7334             | 0.1960         |
|                          | 2.00  | 10  | 4.0667 | 0.8721             | 0.2758         |
|                          | 3.00  | 17  | 3.2745 | 0.6896             | 0.1672         |
|                          | 4.00  | 18  | 3.4815 | 0.7857             | 0.1852         |
|                          | 5.00  | 16  | 3.4167 | 0.8650             | 0.2162         |
|                          | 6.00  | 14  | 3.4524 | 0.6744             | 0.1802         |
|                          | 7.00  | 15  | 3.3778 | 0.7854             | 0.2028         |

| Factors                           | ORCs  | N   | Mean   | Standard Deviation | Standard Error |
|-----------------------------------|-------|-----|--------|--------------------|----------------|
|                                   | 8.00  | 13  | 2.8974 | 0.9849             | 0.2732         |
|                                   | 9.00  | 16  | 3.1667 | 0.4037             | 0.1009         |
|                                   | 10.00 | 16  | 3.2917 | 0.5821             | 0.1455         |
|                                   | 11.00 | 14  | 3.9286 | 0.4563             | 0.1219         |
|                                   | 12.00 | 17  | 3.9804 | 1.1085             | 0.2688         |
|                                   | 13.00 | 15  | 3.4000 | 0.9361             | 0.2417         |
|                                   | 14.00 | 16  | 3.5208 | 0.5301             | 0.1325         |
|                                   | 15.00 | 13  | 3.6923 | 0.6156             | 0.1707         |
|                                   | 16.00 | 17  | 3.7255 | 0.7838             | 0.1901         |
|                                   | Total | 241 | 3.5104 | 0.7906             | 0.0509         |
| ODAS3- Outdoor UTA                | 1.00  | 16  | 2.4500 | 0.6429             | 0.1607         |
|                                   | 2.00  | 14  | 2.3429 | 1.2586             | 0.3364         |
|                                   | 3.00  | 17  | 2.4000 | 0.8185             | 0.1985         |
|                                   | 4.00  | 18  | 2.9000 | 1.1381             | 0.2683         |
|                                   | 5.00  | 15  | 2.8133 | 1.1526             | 0.2976         |
|                                   | 6.00  | 15  | 2.6533 | 0.8798             | 0.2272         |
|                                   | 7.00  | 15  | 2.6933 | 0.8345             | 0.2155         |
|                                   | 8.00  | 10  | 2.3400 | 0.8003             | 0.2531         |
|                                   | 9.00  | 16  | 2.7500 | 0.3967             | 0.0992         |
|                                   | 10.00 | 16  | 2.8125 | 1.0942             | 0.2735         |
|                                   | 11.00 | 14  | 2.6571 | 0.9095             | 0.2431         |
|                                   | 12.00 | 17  | 3.0706 | 1.2287             | 0.2980         |
|                                   | 13.00 | 17  | 3.0118 | 1.0618             | 0.2575         |
|                                   | 14.00 | 15  | 2.8400 | 0.8559             | 0.2210         |
|                                   | 15.00 | 14  | 2.4000 | 0.8376             | 0.2239         |
|                                   | 16.00 | 14  | 3.0286 | 0.9277             | 0.2479         |
|                                   | Total | 243 | 2.7119 | 0.9581             | 0.0615         |
| ODAS4- Nature exposure activities | 1.00  | 16  | 2.7125 | 0.4674             | 0.1169         |
|                                   | 2.00  | 14  | 2.5857 | 1.1883             | 0.3176         |
|                                   | 3.00  | 17  | 2.4941 | 0.9114             | 0.2210         |
|                                   | 4.00  | 18  | 2.3778 | 1.1780             | 0.2777         |
|                                   | 5.00  | 16  | 2.8125 | 0.7173             | 0.1793         |
|                                   | 6.00  | 15  | 2.9333 | 0.9933             | 0.2565         |
|                                   | 7.00  | 15  | 2.5600 | 0.6895             | 0.1780         |
|                                   | 8.00  | 18  | 2.3889 | 0.9393             | 0.2214         |
|                                   | 9.00  | 16  | 2.5250 | 0.5508             | 0.1377         |
|                                   | 10.00 | 16  | 2.8250 | 0.8418             | 0.2105         |
|                                   | 11.00 | 14  | 2.7571 | 0.8985             | 0.2401         |
|                                   | 12.00 | 17  | 3.0000 | 1.2865             | 0.3120         |
|                                   | 13.00 | 17  | 2.7647 | 1.1073             | 0.2686         |
|                                   | 14.00 | 15  | 2.8667 | 0.9730             | 0.2512         |
|                                   | 15.00 | 14  | 2.6714 | 0.7710             | 0.2061         |
|                                   | 16.00 | 17  | 2.6941 | 0.6290             | 0.1525         |
|                                   | Total | 255 | 2.6808 | 0.9078             | 0.0569         |
